# Supplementary material for: RaMP: A Comprehensive Relational Database of Metabolomics Pathways for Pathway Enrichment Analysis of Genes and Metabolites
Source: MDPI journal article supplement (doi:10.3390/metabo8010016), 2018-02-22
Supplement: s1 [file s1]

**Table S1:** List of IDs and other information retrieved from each database.

| Database     | Compound Information                                                                                                                                                         | Gene Information                                                                                                            | Pathway Information                                                                                                                                              |
|--------------|------------------------------------------------------------------------------------------------------------------------------------------------------------------------------|-----------------------------------------------------------------------------------------------------------------------------|------------------------------------------------------------------------------------------------------------------------------------------------------------------|
| KEGG         | <ul style="list-style-type: none"><li>• ID (prefix “C”)</li><li>• Synonyms</li><li>• Other IDs (ChEBI, CAS)</li></ul>                                                        | <ul style="list-style-type: none"><li>• ID (prefix “hsa”)</li><li>• Other IDs (UniProt, KEGG, Ensembl, HUGO name)</li></ul> | <ul style="list-style-type: none"><li>• ID (prefix ”map” and “hsa”)</li><li>• Name</li></ul>                                                                     |
| HMDB         | <ul style="list-style-type: none"><li>• ID (prefix “HMDB”)</li><li>• Synonyms</li><li>• Other IDs (ChEBI,DrugBank, ChemSpider, KEGG,BioCyc, PubChem compound, CAS)</li></ul> | <ul style="list-style-type: none"><li>• ID (UniProt)</li><li>• Other IDs (HUGO name)</li></ul>                              | <ul style="list-style-type: none"><li>• ID (SMPDB id)</li><li>• Name</li><li>• Ontologies (biofluid type, cellular location, origins, tissue location)</li></ul> |
| Reactome     | <ul style="list-style-type: none"><li>• ID (ChEBI ID)</li></ul>                                                                                                              | <ul style="list-style-type: none"><li>• ID (UniProt)</li></ul>                                                              | <ul style="list-style-type: none"><li>• ID (prefix “R-HSA-”)</li><li>• Name</li></ul>                                                                            |
| WikiPathways | <ul style="list-style-type: none"><li>• ID</li><li>• Other IDs (HMDB, KEGG, PubChem compound, ChEBI, CAS, ChemSpider)</li></ul>                                              | <ul style="list-style-type: none"><li>• ID</li><li>• Other IDs (UniProt, Entrez, Ensembl)</li></ul>                         | <ul style="list-style-type: none"><li>• ID (prefix “WP”)</li><li>• Name</li><li>• Category (e.g. Metabolism)</li></ul>                                           |
