# Supplementary material for: RaMP: A Comprehensive Relational Database of Metabolomics Pathways for Pathway Enrichment Analysis of Genes and Metabolites
Source: MDPI journal article supplement (doi:10.3390/metabo8010016), 2018-02-22
Supplement: s1 [file s1]

- Retrieve analyte from given pathway name
- Retrieve pathway from given analytes
- Retrieve analytes involved in same reaction
- Retrieve ontologies from given metabolites

Click to Exit RaMP

Download Results

Visualize gene-metabolite interaction network

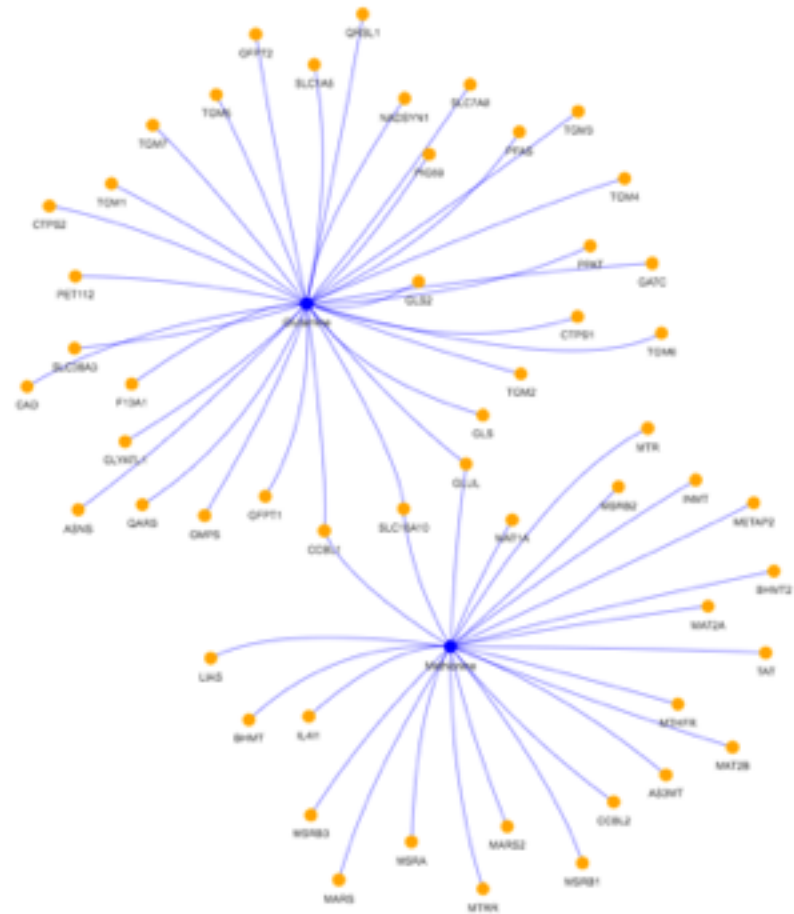

**Supplementary Figure 2:** Network visualization of gene-metabolite relationships, for genes that catalyze reactions involving glutamine and methionine.
