# Supplementary material for: RaMP: A Comprehensive Relational Database of Metabolomics Pathways for Pathway Enrichment Analysis of Genes and Metabolites
Source: MDPI journal article supplement (doi:10.3390/metabo8010016), 2018-02-22
Supplement: s1 [file s1]

KEGG metabolites vs. Pathways

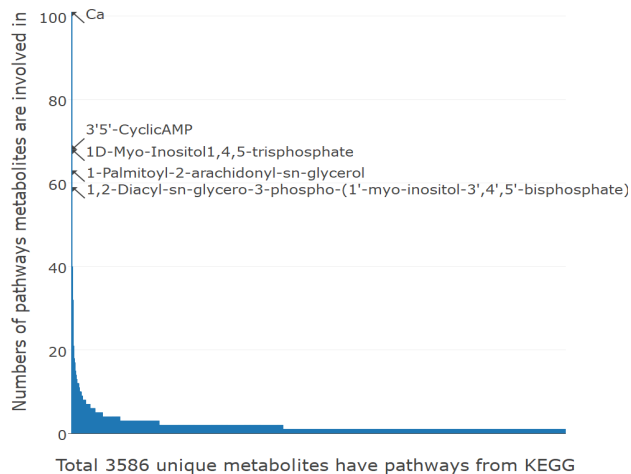

a)

Reactome metabolites vs. Pathways

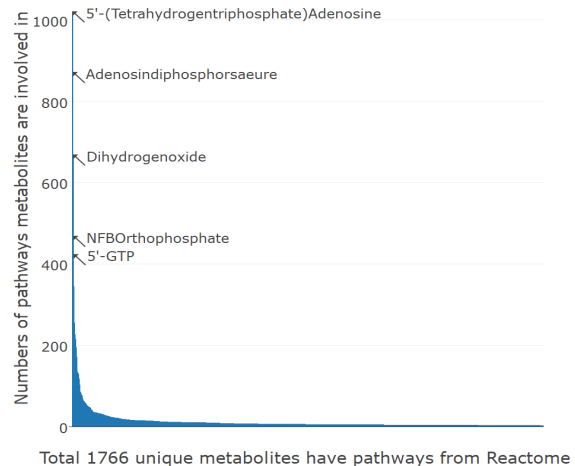

b)

Wikipathways metabolites vs. Pathways

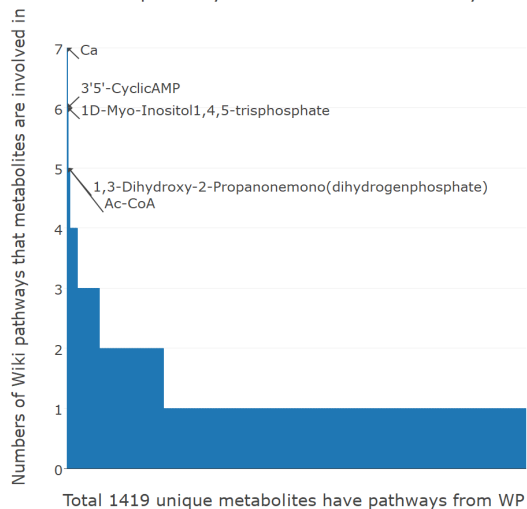

c)

**Supplementary Figure 1: Promiscuity of pathway involvement. For each metabolite, the number of pathways it belongs to is plotted for a) KEGG, b) Reactome, c) WikiPathways.**
